# Supplementary material
Source: Springer Nature journal article supplement (https://www.springermedizin.de/resource/supplementary/13584_2012_28_MOESM1_ESM.pdf/9676824)
Supplement: MOESM1 [file 9676824]

**Total study sample**  
**N=500**  
**100%**

**Not found**  
**N=95**  
**19%**

**Do not speak Hebrew or Russian**  
**N=12**  
**2.4%**

**Found**  
**N=393**  
**78.6%**

**Wrong number, didn't answer, not connected**  
**N=81**  
**85%**

**No telephone**  
**N=6**  
**6%**

**Answering machine**  
**N=8**  
**8%**

**Stopped interview in middle**  
**N=32**  
**8%**

**Interviewed**  
**N=200**  
**51%**

**Refused**  
**N=161**  
**41%**
